# Supplementary material for: Amino acid composition and δ 15 N of suspended matter in the Arabian Sea: implications for organic matter sources and degradation
Source: Copernicus journal article supplement (doi:10.5194/bg-10-7689-2013), 2013-11-27
Supplement: Supplementary file 1 [file bg-10-7689-2013-supplement.zip]

| Station No. | Depth [m] | $\delta^{15}\text{N}_{\text{PN}}$ [‰] | Total Flux [mg/m <sup>2</sup> d <sup>-1</sup> ] | POC [mg/m <sup>2</sup> d <sup>-1</sup> ] | POC [%] | OM [%] | N [%] | C/N <sub>mol</sub> | Carbonate [%] | AA+HA [mg/m <sup>2</sup> d <sup>-1</sup> ] | AA+HA [mg/g sed.] | ASP/b-ALA | GLU/g-ABA | RI   | DI   | AA-C [%] | AA-N [%] |
|-------------|-----------|---------------------------------------|-------------------------------------------------|------------------------------------------|---------|--------|-------|--------------------|---------------|--------------------------------------------|-------------------|-----------|-----------|------|------|----------|----------|
| EASTsh 1+2  | ~1300     | 6.45                                  | 19.73                                           | 1.96                                     | 9.94    | 17.89  | 1.24  | 8.22               | 51.42         | 0.98                                       | 49.68             | 15.82     | 20.73     | 6.08 | 0.57 | 18.55    | 47.87    |
| EASTsh 3    | 1705      | 6.51                                  | 89.23                                           | 5.98                                     | 6.70    | 12.06  | 0.77  | 8.79               | 52.00         | 1.87                                       | 20.98             | 11.35     | 12.14     | 3.63 | 0.40 | 12.96    | 33.43    |
| EAST sh 4   | 1310      | 6.40                                  | 18.98                                           | 1.77                                     | 9.35    | 16.83  | 1.14  | 8.18               | 52.06         | 0.70                                       | 37.11             | 15.19     | 20.60     | 5.37 | 0.57 | 16.20    | 41.78    |
| EAST sh 5   | 1459      | 6.01                                  | 2.66                                            | 0.15                                     | 5.80    | 10.44  | 0.94  | 7.86               | 56.18         | 0.05                                       | 19.40             | 10.71     | 8.37      | 3.04 | 0.58 | 11.73    | 22.83    |
| EAST sh 6   | 1692      | 6.40                                  | 91.18                                           | 9.47                                     | 10.38   | 18.69  | 1.61  | 7.26               | 42.89         | 2.38                                       | 26.14             | 12.81     | 12.53     | 4.04 | 0.51 | 12.92    | 33.26    |
| EAST dp 1   | 3770      |                                       | 119.12                                          | 8.53                                     | 7.63    | 13.74  | 0.80  | 9.63               | 47.35         | 2.11                                       | 18.30             | 9.76      | 9.14      | 3.05 | 0.22 | 10.17    | 31.25    |
| EAST dp 2+3 | ~3775     | 6.40                                  | 66.37                                           | 4.99                                     | 7.26    | 13.07  | 0.80  | 9.23               | 52.25         | 2.00                                       | 18.35             | 11.29     | 10.73     | 3.49 | 0.36 | 13.46    | 41.00    |
| EAST dp 4+5 | ~2850     | 5.72                                  | 68.31                                           | 5.03                                     | 6.27    | 11.28  | 0.71  | 8.80               | 51.40         | 1.93                                       | 17.38             | 12.66     | 10.32     | 3.59 | 0.35 | 12.13    | 32.34    |
| EAST dp 6   | 2928      | 5.81                                  | 80.37                                           | 5.19                                     | 6.31    | 11.36  | 0.97  | 7.26               | 49.36         | 2.04                                       | 20.85             | 12.03     | 9.53      | 3.34 | 0.36 | 13.85    | 34.40    |
| CAST sh 1   | 732       |                                       | 115.18                                          | 7.80                                     | 7.10    | 12.77  | 0.91  | 7.90               | 64.33         | 3.78                                       | 30.54             | 13.88     | 20.84     | 5.51 | 0.56 | 17.73    | 45.84    |
| CAST sh 2+3 | ~1050     | 8.01                                  | 75.71                                           | 6.83                                     | 8.25    | 14.86  | 1.15  | 7.63               | 61.25         | 3.81                                       | 38.95             | 15.95     | 20.66     | 6.35 | 0.65 | 19.71    | 48.12    |
| CAST sh 4+5 | ~1450     | 8.19                                  | 56.17                                           | 6.10                                     | 7.94    | 14.29  | 1.04  | 7.44               | 56.07         | 2.71                                       | 33.06             | 10.29     | 13.20     | 6.96 | 0.31 | 16.68    | 36.04    |
| CAST dp 1   | 3900      | 7.48                                  | 101.50                                          | 5.55                                     | 5.89    | 10.60  | 0.73  | 8.26               | 63.97         | 1.83                                       | 20.07             | 10.74     | 17.97     | 3.93 | 0.34 | 13.71    | 37.33    |
| CAST dp 2+3 | 3900      | 7.21                                  | 53.88                                           | 4.59                                     | 6.39    | 11.51  | 0.78  | 8.43               | 65.00         | 2.11                                       | 25.07             | 11.40     | 16.81     | 4.19 | 0.35 | 15.42    | 41.44    |
| CAST dp 4   | 2933      | 7.32                                  | 114.84                                          | 7.26                                     | 6.48    | 11.66  | 0.81  | 7.98               | 59.87         |                                            |                   | 13.29     | 14.28     | 4.11 | 0.26 | 13.68    | 36.43    |
| CAST dp 5+6 | ~3070     | 6.32                                  | 21.34                                           | 1.66                                     | 7.26    | 13.06  | 0.94  | 7.57               | 55.77         | 1.24                                       | 31.08             | 10.54     | 25.69     | 4.91 | 0.34 | 16.85    | 42.64    |
| WAST sh 1+2 | 1030      | 7.78                                  | 115.28                                          | 8.35                                     | 8.57    | 15.42  | 1.10  | 8.35               | 58.68         | 4.53                                       | 46.49             | 16.76     | 24.27     | 5.80 | 0.49 | 20.14    | 50.22    |
| WAST sh 3   | 1085      | 7.47                                  | 247.18                                          | 12.27                                    | 7.70    | 13.86  | 1.00  | 7.69               | 59.22         | 5.45                                       | 32.83             | 13.96     | 14.95     | 4.98 | 0.54 | 17.69    | 44.36    |
| WAST sh 4+5 | ~1085     |                                       | 26.98                                           | 3.23                                     | 9.11    | 16.40  | 1.06  | 8.37               | 34.96         | 1.60                                       | 27.01             | 10.47     | 15.31     | 5.72 | 0.38 | 24.53    | 56.31    |
| WAST sh 6   | 1093      | 7.84                                  | 68.86                                           | 5.23                                     | 7.28    | 13.11  | 0.99  | 7.89               | 34.20         | 2.64                                       | 30.36             | 6.63      | 7.15      | 4.63 | 0.35 | 19.98    | 51.69    |
| WAST dp 1   | 4020      | 6.78                                  | 173.28                                          | 7.48                                     | 4.59    | 8.27   | 0.56  | 8.33               | 56.98         | 3.39                                       | 19.96             | 15.72     | 13.52     | 4.39 | 0.20 | 17.27    | 46.33    |
| WAST dp 2   | 4018      | 7.33                                  | 63.28                                           | 3.34                                     | 7.84    | 14.12  | 0.98  | 8.14               | 60.76         | 1.58                                       | 40.18             | 14.55     | 20.32     | 5.13 | 0.41 | 20.33    | 52.99    |
| WAST dp 3   | 4010      | 7.09                                  | 216.18                                          | 10.10                                    | 6.35    | 11.43  | 0.81  | 7.91               | 59.54         | 3.97                                       | 23.56             | 7.14      | 15.79     | 4.09 | 0.26 | 15.03    | 39.89    |
| WAST dp 4   | 4016      | 7.39                                  | 159.41                                          | 8.78                                     | 6.15    | 11.07  | 0.76  | 8.83               | 57.97         | 3.22                                       | 22.89             | 14.79     | 14.39     | 4.73 | 0.22 | 14.53    | 41.52    |
| WAST dp 5+6 | 4016      | 7.44                                  | 215.76                                          | 12.25                                    | 6.30    | 11.34  | 0.82  | 7.71               | 50.45         | 5.29                                       | 27.18             | 9.03      | 9.19      | 2.92 | 0.40 | 16.03    | 41.53    |
