# Supplementary material for: Amino acid composition and δ 15 N of suspended matter in the Arabian Sea: implications for organic matter sources and degradation
Source: Copernicus journal article supplement (doi:10.5194/bg-10-7689-2013), 2013-11-27
Supplement: Supplementary file 2 [file bg-10-7689-2013-supplement.zip]

| Sample No.        | Asp   | Thr  | Ser   | Glu   | Gly   | Ala   | Val  | Met  | Ile  | Leu  | Tyr  | Phe  | β-Ala | γ-Aba | Orn  | Lys  | His  | Arg  |
|-------------------|-------|------|-------|-------|-------|-------|------|------|------|------|------|------|-------|-------|------|------|------|------|
| EAST shallow #1+2 | 12.54 | 5.55 | 6.75  | 9.63  | 17.93 | 9.68  | 6.64 | 1.31 | 3.61 | 5.36 | 3.99 | 3.07 | 0.79  | 0.46  | 0.13 | 6.05 | 2.25 | 4.25 |
| East shallow #3   | 12.61 | 5.85 | 6.88  | 9.91  | 18.95 | 9.41  | 6.25 | 1.16 | 3.35 | 4.78 | 3.99 | 2.92 | 1.11  | 0.82  | 0.42 | 5.69 | 2.14 | 3.76 |
| East shallow #4   | 12.69 | 6.08 | 6.84  | 10.62 | 17.97 | 9.23  | 5.52 | 1.00 | 3.49 | 4.93 | 4.20 | 3.01 | 0.84  | 0.52  | 0.20 | 6.57 | 2.41 | 3.89 |
| East shallow #5   | 11.70 | 5.54 | 7.88  | 10.01 | 17.57 | 8.65  | 5.69 | 1.07 | 3.11 | 4.70 | 3.99 | 2.96 | 1.09  | 1.20  | 0.69 | 6.52 | 2.73 | 4.89 |
| East shallow #6   | 11.96 | 5.93 | 7.65  | 9.92  | 18.38 | 9.06  | 5.76 | 1.23 | 3.26 | 4.88 | 3.94 | 2.99 | 0.93  | 0.79  | 0.52 | 5.88 | 2.44 | 4.49 |
| East deep #1      | 13.35 | 5.97 | 7.80  | 9.53  | 17.58 | 9.04  | 6.26 | 0.86 | 3.15 | 4.88 | 3.39 | 2.97 | 1.37  | 1.04  | 0.25 | 6.42 | 1.99 | 4.17 |
| East deep #2+3    | 12.97 | 5.82 | 7.11  | 9.57  | 18.47 | 9.33  | 5.78 | 1.16 | 3.22 | 4.73 | 3.91 | 2.88 | 1.15  | 0.89  | 0.47 | 6.29 | 2.13 | 4.12 |
| EAST deep #4+5    | 12.89 | 5.76 | 7.71  | 10.05 | 18.49 | 9.14  | 5.73 | 1.08 | 3.17 | 4.57 | 3.85 | 2.93 | 1.02  | 0.97  | 0.53 | 5.91 | 2.12 | 4.08 |
| EAST deep #6      | 12.89 | 5.94 | 7.90  | 9.67  | 18.12 | 9.31  | 5.96 | 1.13 | 3.16 | 4.53 | 3.92 | 2.98 | 1.07  | 1.01  | 0.58 | 5.81 | 2.16 | 3.85 |
| Cast shallow #1   | 12.25 | 5.91 | 6.73  | 9.72  | 17.39 | 10.03 | 6.16 | 1.29 | 3.60 | 5.35 | 4.01 | 3.21 | 0.88  | 0.47  | 0.47 | 5.29 | 2.34 | 4.90 |
| Cast shallow #2+3 | 12.44 | 5.79 | 7.05  | 9.71  | 17.53 | 9.45  | 6.09 | 1.40 | 3.63 | 5.46 | 4.04 | 3.22 | 0.78  | 0.47  | 0.32 | 5.71 | 2.34 | 4.56 |
| Cast shallow #4+5 | 11.93 | 5.75 | 7.80  | 9.72  | 17.66 | 10.02 | 5.96 | 1.28 | 3.42 | 5.13 | 4.39 | 3.19 | 1.16  | 0.74  | 1.17 | 4.39 | 1.74 | 4.56 |
| Cast deep #1      | 13.09 | 6.04 | 7.76  | 9.55  | 19.04 | 8.86  | 5.93 | 0.89 | 3.17 | 4.46 | 4.01 | 2.83 | 1.22  | 0.53  | 0.70 | 5.96 | 2.35 | 3.61 |
| Cast deep #2+3    | 13.21 | 5.95 | 7.30  | 9.80  | 18.96 | 9.24  | 5.68 | 1.05 | 3.12 | 4.48 | 4.32 | 2.78 | 1.16  | 0.58  | 0.55 | 5.36 | 2.24 | 4.22 |
| Cast deep #4      | 13.48 | 5.63 | 7.25  | 9.52  | 18.75 | 9.01  | 5.82 | 0.95 | 3.05 | 4.21 | 4.06 | 2.69 | 1.01  | 0.67  | 0.28 | 6.85 | 2.29 | 4.47 |
| Cast deep #5+6    | 12.42 | 5.62 | 8.33  | 9.70  | 20.10 | 9.10  | 5.51 | 0.98 | 2.97 | 4.48 | 4.46 | 2.88 | 1.10  | 0.40  | 0.47 | 5.20 | 2.38 | 3.92 |
| Wast shallow #1+2 | 13.11 | 6.11 | 7.22  | 10.05 | 17.09 | 9.80  | 6.21 | 1.07 | 3.59 | 5.28 | 3.94 | 3.22 | 0.78  | 0.41  | 0.22 | 4.94 | 2.15 | 4.80 |
| Wast shallow #3   | 12.82 | 5.95 | 7.01  | 9.39  | 17.36 | 9.67  | 5.99 | 1.30 | 3.55 | 5.12 | 4.13 | 3.09 | 0.92  | 0.63  | 0.53 | 5.80 | 2.31 | 4.46 |
| Wast shallow #4+5 | 11.59 | 6.17 | 6.50  | 9.81  | 14.76 | 9.34  | 6.39 | 2.18 | 4.46 | 6.32 | 3.61 | 3.66 | 1.11  | 0.64  | 0.62 | 6.20 | 2.27 | 4.39 |
| Wast shallow #6   | 11.06 | 5.97 | 7.05  | 8.90  | 15.79 | 9.55  | 6.05 | 1.44 | 3.45 | 5.23 | 3.85 | 3.29 | 1.67  | 1.25  | 1.60 | 6.82 | 3.23 | 3.78 |
| Wast deep #1      | 15.11 | 6.64 | 7.74  | 9.53  | 17.36 | 9.24  | 5.96 | 1.09 | 3.37 | 4.68 | 3.80 | 3.19 | 0.96  | 0.70  | 0.33 | 4.46 | 1.78 | 4.05 |
| Wast deep #2      | 13.60 | 5.79 | 7.15  | 9.53  | 18.36 | 9.45  | 6.41 | 1.11 | 3.48 | 4.88 | 4.01 | 2.94 | 0.93  | 0.47  | 0.14 | 5.92 | 2.15 | 3.68 |
| Wast deep #3      | 14.17 | 5.81 | 6.58  | 9.34  | 16.88 | 9.11  | 5.79 | 1.01 | 3.22 | 4.44 | 3.96 | 2.90 | 1.98  | 0.59  | 0.47 | 5.81 | 2.22 | 5.71 |
| Wast deep #4      | 13.70 | 5.89 | 7.42  | 9.49  | 18.60 | 9.37  | 5.80 | 0.89 | 3.13 | 4.37 | 3.97 | 2.80 | 0.93  | 0.66  | 0.22 | 6.25 | 2.15 | 4.35 |
| Wast deep #5+6    | 12.35 | 5.81 | 8.36  | 8.48  | 17.26 | 8.75  | 5.17 | 1.13 | 3.22 | 4.31 | 3.86 | 2.92 | 1.66  | 1.16  | 1.75 | 6.07 | 3.59 | 4.16 |
| 44 surface        | 11.68 | 6.00 | 7.29  | 12.91 | 12.33 | 10.75 | 6.85 | 0.20 | 5.14 | 8.33 | 2.62 | 4.19 | 0.15  | 0.57  | 0.28 | 4.87 | 1.59 | 4.26 |
| 44 20m            | 11.28 | 6.07 | 8.35  | 12.22 | 12.83 | 10.82 | 6.85 | 0.17 | 5.01 | 7.72 | 2.25 | 3.91 | 0.13  | 0.24  | 0.96 | 5.16 | 1.85 | 4.18 |
| 44 120m           | 11.06 | 5.49 | 9.77  | 11.90 | 16.14 | 8.83  | 6.09 | 0.46 | 4.64 | 7.53 | 2.03 | 3.77 | 0.21  | 0.36  | 0.86 | 4.79 | 1.80 | 4.27 |
| 44 450m           | 10.14 | 4.78 | 11.24 | 12.86 | 19.50 | 7.21  | 5.15 | 0.37 | 4.19 | 7.27 | 1.93 | 3.43 | 0.12  | 0.28  | 0.86 | 4.42 | 1.76 | 4.50 |
| 45 surface        | 11.17 | 5.72 | 7.80  | 13.27 | 14.11 | 9.89  | 6.40 | 0.21 | 4.70 | 8.04 | 2.23 | 3.66 | 0.09  | 0.15  | 0.20 | 5.84 | 1.72 | 4.78 |
| 45 20m            | 11.29 | 5.95 | 7.94  | 12.39 | 13.29 | 10.12 | 6.41 | 0.65 | 4.91 | 7.62 | 1.85 | 3.71 | 0.23  | 0.40  | 0.72 | 5.69 | 2.08 | 4.75 |
| 46 surface        | 11.10 | 6.08 | 9.87  | 10.77 | 12.74 | 10.54 | 6.56 | 0.33 | 4.77 | 7.93 | 2.61 | 3.85 | 0.10  | 0.22  | 1.66 | 4.78 | 2.04 | 4.05 |
| 46 15m            | 11.23 | 5.86 | 8.26  | 12.58 | 14.72 | 9.85  | 6.53 | 0.16 | 4.58 | 7.57 | 2.64 | 3.92 | 0.15  | 0.24  | 0.34 | 4.93 | 1.49 | 4.96 |
| 46 125m           | 10.61 | 4.94 | 9.67  | 12.99 | 18.09 | 7.90  | 6.05 | 0.35 | 4.53 | 7.57 | 2.22 | 3.68 | 0.14  | 0.25  | 0.40 | 4.76 | 1.58 | 4.26 |
| 46 300m           | 10.03 | 4.58 | 10.87 | 12.95 | 19.88 | 6.81  | 5.10 | 0.44 | 4.34 | 7.58 | 2.40 | 3.48 | 0.13  | 0.21  | 0.40 | 4.67 | 1.56 | 4.59 |
| 47 surface        | 11.18 | 5.19 | 9.86  | 14.37 | 9.97  | 6.84  | 5.51 | 0.26 | 4.61 | 7.99 | 3.76 | 4.57 | 0.06  | 0.09  | 1.64 | 5.75 | 2.49 | 5.87 |
| 47 100m           | 10.09 | 4.33 | 11.03 | 13.69 | 21.12 | 6.68  | 4.87 | 0.40 | 4.19 | 7.40 | 0.81 | 3.34 | 0.15  | 0.18  | 0.48 | 4.62 | 1.77 | 4.87 |
| 47 300m           | 9.58  | 3.78 | 12.05 | 13.79 | 23.01 | 5.61  | 4.32 | 0.25 | 4.01 | 7.33 | 2.31 | 3.22 | 0.07  | 0.14  | 0.21 | 4.16 | 1.47 | 4.69 |
| 48 surface        | 10.76 | 5.40 | 8.98  | 12.24 | 15.32 | 9.31  | 6.04 | 0.42 | 4.58 | 7.95 | 2.74 | 3.70 | 0.13  | 0.16  | 0.73 | 5.27 | 1.75 | 4.54 |
| 48 100m           | 9.71  | 3.89 | 11.62 | 14.32 | 22.07 | 5.95  | 4.44 | 0.11 | 3.99 | 7.47 | 2.36 | 3.31 | 0.05  | 0.15  | 0.19 | 4.25 | 1.53 | 4.58 |
| 48 300m           | 10.31 | 4.61 | 10.41 | 13.19 | 19.19 | 7.45  | 5.19 | 0.18 | 4.31 | 7.73 | 2.59 | 3.47 | 0.06  | 0.13  | 0.20 | 4.74 | 1.63 | 4.61 |
| 49 surface        | 11.89 | 5.65 | 8.72  | 12.66 | 14.78 | 9.50  | 6.29 | 0.20 | 4.84 | 8.32 | 1.83 | 4.10 | 0.07  | 0.09  | 0.23 | 4.69 | 1.58 | 4.56 |
| 50 surface        | 11.43 | 5.81 | 8.00  | 12.42 | 13.18 | 9.64  | 6.71 | 0.26 | 5.01 | 8.39 | 2.60 | 3.93 | 0.11  | 0.11  | 0.38 | 5.60 | 1.72 | 4.71 |
| 51 surface        | 11.04 | 5.70 | 7.60  | 12.93 | 14.16 | 10.16 | 6.56 | 0.32 | 4.75 | 7.85 | 2.65 | 3.57 | 0.07  | 0.12  | 0.28 | 5.84 | 1.76 | 4.64 |
| 51 15m            | 11.24 | 5.84 | 7.18  | 13.22 | 14.54 | 10.47 | 6.74 | 0.21 | 4.68 | 7.73 | 2.14 | 3.68 | 0.48  | 0.15  | 0.18 | 5.45 | 1.48 | 4.58 |
| 51 50m            | 10.69 | 4.89 | 9.84  | 13.08 | 17.79 | 8.23  | 5.50 | 0.12 | 4.34 | 7.76 | 2.57 | 3.67 | 0.09  | 0.10  | 0.22 | 4.82 | 1.71 | 4.59 |
| 51 100m           | 9.92  | 3.95 | 11.72 | 13.92 | 21.83 | 6.18  | 4.53 | 0.08 | 4.04 | 7.56 | 1.81 | 3.26 | 0.06  | 0.08  | 0.13 | 4.54 | 1.65 | 4.75 |
| 51 300m           | 9.66  | 4.10 | 13.07 | 12.55 | 21.60 | 6.31  | 4.42 | 0.07 | 3.96 | 7.13 | 2.08 | 3.17 | 0.05  | 0.13  | 1.08 | 4.57 | 1.80 | 4.27 |
| 53 surface        | 10.38 | 5.02 | 9.22  | 13.25 | 16.08 | 8.79  | 6.20 | 0.38 | 4.66 | 8.41 | 2.08 | 3.81 | 0.11  | 0.13  | 0.22 | 4.96 | 1.61 | 4.71 |
| 54 surface        | 10.62 | 5.14 | 8.91  | 12.96 | 15.54 | 8.38  | 5.90 | 0.39 | 4.71 | 8.16 | 2.52 | 3.81 | 0.06  | 0.16  | 0.46 | 5.59 | 1.65 | 5.05 |
| 54 35m            | 10.24 | 5.30 | 9.03  | 12.00 | 15.61 | 9.99  | 6.16 | 0.18 | 4.43 | 7.96 | 2.99 | 3.52 | 0.04  | 0.08  | 0.81 | 5.21 | 1.84 | 4.59 |
| 54 100m           | 9.23  | 3.87 | 11.51 | 13.62 | 20.99 | 5.93  | 4.45 | 1.03 | 4.04 | 7.41 | 3.20 | 3.19 | 0.01  | 0.11  | 0.21 | 4.92 | 1.67 | 4.62 |
| 54 300m           | 9.59  | 3.92 | 12.34 | 13.36 | 22.23 | 5.92  | 4.37 | 0.09 | 4.00 | 7.32 | 2.21 | 3.22 | 0.05  | 0.11  | 0.48 | 4.64 | 1.68 | 4.46 |
| 55 surface        | 10.49 | 4.99 | 9.31  | 12.90 | 16.63 | 8.25  | 5.67 | 0.28 | 4.57 | 8.18 | 2.63 | 3.63 | 0.06  | 0.06  | 0.36 | 5.39 | 1.66 | 4.95 |
| 56 surface        | 10.23 | 4.48 | 10.64 | 13.68 | 19.01 | 7.13  | 5.11 | 0.20 | 4.38 | 7.85 | 2.12 | 3.48 | 0.06  | 0.12  | 0.21 | 5.08 | 1.59 | 4.64 |
| 56 20m            | 9.62  | 4.93 | 9.85  | 13.31 | 16.34 | 8.76  | 6.09 | 0.13 | 4.98 | 8.50 | 2.04 | 3.46 | 0.06  | 0.07  | 0.29 | 5.46 | 1.74 | 4.37 |
| 56 100m           | 9.58  | 3.80 | 11.74 | 14.07 | 22.20 | 5.85  | 4.41 | 0.11 | 3.98 | 7.46 | 1.98 | 3.28 | 0.06  | 0.07  | 0.19 | 4.89 | 1.71 | 4.63 |
| 56 300m           | 9.77  | 4.06 | 11.86 | 13.54 | 21.47 | 6.23  | 4.70 | 0.23 | 4.18 | 7.63 | 1.61 | 3.36 | 0.03  | 0.10  | 0.31 | 4.65 | 1.77 | 4.51 |
| 56 50m            | 10.73 | 4.77 | 9.78  | 13.31 | 18.49 | 7.60  | 5.36 | 0.24 | 4.48 | 7.86 | 2.14 | 3.61 | 0.10  | 0.08  | 0.15 | 5.04 | 1.68 | 4.57 |
| 57 surface        | 10.69 | 5.20 | 10.02 | 12.83 | 16.71 | 8.22  | 5.68 | 0.31 | 4.62 | 7.92 | 2.39 | 3.72 | 0.23  | 0.11  | 0.40 | 4.91 | 1.63 | 4.42 |
| 58 surface        | 10.67 | 5.31 | 8.75  | 12.99 | 15.79 | 8.68  | 5.93 | 0.25 | 4.75 | 8.06 | 2.72 | 3.71 | 0.09  | 0.11  | 0.26 | 5.56 | 1.74 | 4.62 |
| 58 25m            | 10.32 | 4.97 | 9.42  | 13.00 | 18.53 | 8.05  | 5.62 | 0.20 | 4.50 | 7.83 | 2.42 | 3.73 | 0.06  | 0.09  | 0.18 | 4.99 | 1.64 | 4.50 |
| 58 40m            | 10.76 | 5.40 | 8.54  | 12.83 | 15.26 | 9.65  | 6.06 | 0.22 | 4.60 | 8.21 | 2.73 | 3.73 | 0.06  | 0.10  | 0.27 | 5.26 | 1.69 | 4.62 |
| 58 100m           | 9.79  | 4.09 | 11.43 | 13.49 | 21.31 | 6.33  | 4.70 | 0.14 | 4.13 | 7.51 | 2.06 | 3.46 | 0.07  | 0.11  | 0.21 | 4.84 | 1.78 | 4.56 |
| 58 300m           | 9.44  | 3.99 | 12.05 | 13.45 | 22.20 | 5.89  | 4.45 | 0.15 | 3.96 | 7.24 | 2.12 | 3.31 | 0.05  | 0.13  | 0.31 | 4.70 | 1.87 | 4.68 |
| Plankton 1        | 11.00 | 6.40 | 6.60  | 10.70 | 12.30 | 10.10 | 6.90 | 1.50 | 4.00 | 6.40 | 5.50 | 4.20 | 0.30  | 0.40  | 0.00 | 5.90 | 2.80 | 5.00 |
| Plankton 2        | 9.99  | 5.99 | 5.29  | 11.09 | 14.09 | 12.79 | 7.29 | 1.70 | 4.90 | 7.69 | 4.60 | 3.60 | 0.30  | 0.30  | 0.00 | 4.70 | 1.90 | 3.80 |
| Plankton 3        | 12.69 | 6.59 | 5.99  | 12.89 | 10.19 | 11.89 | 6.39 | 2.10 | 4.20 | 8.39 | 3.80 | 3.40 | 0.20  | 0.10  | 0.00 | 5.2  |      |      |
